# Supplementary material for: A new model for pharmacies? Insights from a quantitative study regarding the public’s perceptions
Source: Springer Nature journal article supplement (doi:10.1186/s12913-019-3987-3), 2019-03-21
Supplement: MOESM1 [file 16566790]

**CESOP****New Pharmacy Model**

Date \_\_\_\_/09/2015 Start time \_\_\_\_:\_\_\_\_ End time \_\_\_\_:\_\_\_\_ Interviewer: \_\_\_\_\_

**Street** \_\_\_\_\_

Good morning/afternoon/evening. My name is \_\_\_\_\_ and I'm working with Centro de Sondagens da Universidade Católica in collaboration with Centro de Estudos e Avaliação em Saúde (CEFAR) from the Associação Nacional das Farmácias (ANF) in carrying out a study that aims to gather some information about the access to medicines and the Portuguese population's preferences for a future pharmacy model. Can you please answer some questions about this subject? YOUR ANSWERS ARE ABSOLUTELY CONFIDENTIAL AND WILL BE USED ONLY FOR THIS STUDY'S PURPOSE.

ASK THE INTERVIEWEE WHICH RESIDENT IN THE HOUSE (18 YEARS OR OLDER) IS CELEBRATING THEIR BIRTHDAY NEXT

**Localities (WHITHOUT ASKING)**

- |                                                                             |                                                     |                                                |                                                                  |
|-----------------------------------------------------------------------------|-----------------------------------------------------|------------------------------------------------|------------------------------------------------------------------|
| <input type="checkbox"/> Alijó                                              | <input type="checkbox"/> Espinho                    | <input type="checkbox"/> Algueirão-Mem Martins | <input type="checkbox"/> UF Romeira e Várzea                     |
| <input type="checkbox"/> Carregosa                                          | <input type="checkbox"/> UF Antuzede e Vil de Matos | <input type="checkbox"/> São Domingos de Rana  | <input type="checkbox"/> UF Ponte de Sor, Tramaga e Vale de Açor |
| <input type="checkbox"/> Várzea, Aliviada e Folhada                         | <input type="checkbox"/> Gafanha do Carmo           | <input type="checkbox"/> Pinhal Novo           | <input type="checkbox"/> Mexilhoeira Grande                      |
| <input type="checkbox"/> UF Braga (S. José de S. Lázaro e S. João do Souto) | <input type="checkbox"/> UF Marrazes e Barosa       | <input type="checkbox"/> Odivelas              | <input type="checkbox"/> Quelfes                                 |
| <input type="checkbox"/> Valongo                                            | <input type="checkbox"/> Esmoriz                    | <input type="checkbox"/> Alcântara             |                                                                  |

**I - ACCESS TO PHARMACY**

P1. What is the first place you go to for advice when a minor ailment arises (e.g. headaches, dyspepsia, acute cough, influenza)?

- Primary Health Care  
 Pharmacy  
 Hospital  
 Hotline (Linha Saúde 24)  
 Other (specify) \_\_\_\_\_  
 I do not usually consult anyone, anywhere  
 Don't know

P2. What is the first place you go to when you have any questions about medication, (e.g. doubts about dosage, indication, how is used, adverse effects)?

- Primary Health Care  
 Pharmacy  
 Hospital  
 Other (specify)? \_\_\_\_\_  
 I do not usually consult anyone anywhere  
 Don't know

P3. In the past year, have you visited the pharmacy?

- Yes  
 No → go to 0  
 Don't know → go to 0

P4. And in the last 6 months, how often did you visit the pharmacy? (READ)

- 6 or more times  
 Between 3 to 5 times  
 Twice  
 Once  
 Never  
 Don't know

P5. How long does it take, on average, and using your usual means of transportation (foot, car or public transport), from your residence to the following places? (READ)

|                     | Minutes              | Prefer not to answer     | Usual means of transportation |                          |                          |
|---------------------|----------------------|--------------------------|-------------------------------|--------------------------|--------------------------|
|                     |                      |                          | On foot                       | Car                      | Public transport         |
| Primary Health Care | <input type="text"/> | <input type="checkbox"/> | <input type="checkbox"/>      | <input type="checkbox"/> | <input type="checkbox"/> |
| Pharmacy            | <input type="text"/> | <input type="checkbox"/> | <input type="checkbox"/>      | <input type="checkbox"/> | <input type="checkbox"/> |
| Hospital            | <input type="text"/> | <input type="checkbox"/> | <input type="checkbox"/>      | <input type="checkbox"/> | <input type="checkbox"/> |

## II – SATISFACTION WITH PHARMACY

**Only for those who visited the Pharmacy at least once in the last year (P3 = Yes)**

**If have NOT visited the Pharmacy in the last year → Go to section III**

**P6. Thinking about your pharmacy (the one you visit the most), how satisfied you are with: (READ)**

|                                                             | Very unsatisfied         | Unsatisfied              | Neither satisfied nor dissatisfied | Satisfied                | Very satisfied           | Don't know               |
|-------------------------------------------------------------|--------------------------|--------------------------|------------------------------------|--------------------------|--------------------------|--------------------------|
| Business hours                                              | <input type="checkbox"/> | <input type="checkbox"/> | <input type="checkbox"/>           | <input type="checkbox"/> | <input type="checkbox"/> | <input type="checkbox"/> |
| Waiting time                                                | <input type="checkbox"/> | <input type="checkbox"/> | <input type="checkbox"/>           | <input type="checkbox"/> | <input type="checkbox"/> | <input type="checkbox"/> |
| The information offered in response to your needs           | <input type="checkbox"/> | <input type="checkbox"/> | <input type="checkbox"/>           | <input type="checkbox"/> | <input type="checkbox"/> | <input type="checkbox"/> |
| Competence of providers                                     | <input type="checkbox"/> | <input type="checkbox"/> | <input type="checkbox"/>           | <input type="checkbox"/> | <input type="checkbox"/> | <input type="checkbox"/> |
| Customer privacy                                            | <input type="checkbox"/> | <input type="checkbox"/> | <input type="checkbox"/>           | <input type="checkbox"/> | <input type="checkbox"/> | <input type="checkbox"/> |
| The location                                                | <input type="checkbox"/> | <input type="checkbox"/> | <input type="checkbox"/>           | <input type="checkbox"/> | <input type="checkbox"/> | <input type="checkbox"/> |
| Access during the night and on weekends                     | <input type="checkbox"/> | <input type="checkbox"/> | <input type="checkbox"/>           | <input type="checkbox"/> | <input type="checkbox"/> | <input type="checkbox"/> |
| The amount and quality of services provided by the pharmacy | <input type="checkbox"/> | <input type="checkbox"/> | <input type="checkbox"/>           | <input type="checkbox"/> | <input type="checkbox"/> | <input type="checkbox"/> |

**P7. In general, how satisfied are you with your pharmacy? (READ)**

- Very unsatisfied  
 Unsatisfied  
 Neither satisfied nor dissatisfied  
 Satisfied  
 Very satisfied  
 Don't know

### III – ACCESS TO MEDICINES

**P8. Are you a chronic disease patient or do you take medicine(s) continuously?**

- Yes       No       Prefer not to answer

**P9. In the last 12 months did you have to go back to the pharmacy, or go to more than one pharmacy, to get all your prescription drugs?**

- Yes       No       Don't know

**P10. In the last 12 months, were you, for any reason, unable to buy a medication prescribed by your doctor?**

- Yes  
 No → go to P12  
 Don't know → go to P12

**P11. (If yes) What was the most common reason not to buy the medicine(s)? (SELECT 1 ANSWER) (READ)**

- Still had the medicine / package home  
 I could not find it in any pharmacy  
 Had less money  
 The reimbursement of the drug has decreased / ended  
 I do not get along with the medicine(s)  
 Other. (specify) \_\_\_\_\_  
 Don't know

### IV – PHARMACY MODEL

**P12. Currently, pharmacies provide a set of services such as vaccinations, medicines counselling, point of care testing for diabetes, among others. To improve public health, in relation to the services provided by pharmacies, you consider that: (READ; choose 1 answer)**

- Pharmacies could provide more services that are currently only provided by other health care units  
 The services provided currently by the pharmacies are enough to cover the population's needs  
 Pharmacies could reduce the number of services provided  
 Don't know

**P13. I will now show you a list of services that are available at the pharmacy, or could be available in the future. Regarding each one, can you please tell me if: 1) You know or have heard about it; 2) How important you rate each service (in a scale from 1 - not important to 5 - very important). (SHOW CARD 1) (READ)**

|                                                                                                                                                                                                                                                                                                                                            | Know /<br>have<br>heard of | Do not<br>know /<br>have not<br>heard of | 1 - Not<br>important     | 2 - Slightly<br>important | 3 - Neither<br>important<br>or<br>unimportant | 4 -<br>Important         | 5 - Very<br>important    | As/Nr                    |
|--------------------------------------------------------------------------------------------------------------------------------------------------------------------------------------------------------------------------------------------------------------------------------------------------------------------------------------------|----------------------------|------------------------------------------|--------------------------|---------------------------|-----------------------------------------------|--------------------------|--------------------------|--------------------------|
| <b>1. Automatic renewal of prescriptions for chronic patients</b><br>(Prescription renewal for chronic patients at the Pharmacy, with no need to go to the Primary Health Care / Family Health Practice to get a prescription)                                                                                                             | <input type="checkbox"/>   | <input type="checkbox"/>                 | <input type="checkbox"/> | <input type="checkbox"/>  | <input type="checkbox"/>                      | <input type="checkbox"/> | <input type="checkbox"/> | <input type="checkbox"/> |
| <b>2. Support in maintaining chronic disease under control</b><br>(Follow-up of chronic patients (e.g. diabetics, hypertensives, chronic respiratory disease, etc.) at the Pharmacy with information shared with the General Practitioner)                                                                                                 | <input type="checkbox"/>   | <input type="checkbox"/>                 | <input type="checkbox"/> | <input type="checkbox"/>  | <input type="checkbox"/>                      | <input type="checkbox"/> | <input type="checkbox"/> | <input type="checkbox"/> |
| <b>3. Integration of health data and mobile devices</b><br>(Use of an integrative App where the user can download their health information (e.g. blood pressure) from various mobile devices (e.g. phones). The collected data could be evaluated together with the pharmacist and, in case of need, referred to the doctor)               | <input type="checkbox"/>   | <input type="checkbox"/>                 | <input type="checkbox"/> | <input type="checkbox"/>  | <input type="checkbox"/>                      | <input type="checkbox"/> | <input type="checkbox"/> | <input type="checkbox"/> |
| <b>4. Monitoring of therapy</b><br>(e.g. control of therapeutic effects, adverse events, adherence)                                                                                                                                                                                                                                        | <input type="checkbox"/>   | <input type="checkbox"/>                 | <input type="checkbox"/> | <input type="checkbox"/>  | <input type="checkbox"/>                      | <input type="checkbox"/> | <input type="checkbox"/> | <input type="checkbox"/> |
| <b>5. Support in the choice of non-prescription medicines</b><br>(Minor ailments advice allowing a quick and effective access to treatment)                                                                                                                                                                                                | <input type="checkbox"/>   | <input type="checkbox"/>                 | <input type="checkbox"/> | <input type="checkbox"/>  | <input type="checkbox"/>                      | <input type="checkbox"/> | <input type="checkbox"/> | <input type="checkbox"/> |
| <b>6. Support the patients in keeping an up-to-date list of medicines</b><br>(For the patient / doctor to compare with the prescribed medicines at hospital stay, in transition or discharge situations)                                                                                                                                   | <input type="checkbox"/>   | <input type="checkbox"/>                 | <input type="checkbox"/> | <input type="checkbox"/>  | <input type="checkbox"/>                      | <input type="checkbox"/> | <input type="checkbox"/> | <input type="checkbox"/> |
| <b>7. Scheduling a medical appointment</b><br>(Possibility of scheduling a medical appointment in the NHS through the pharmacy according to the manifested need)                                                                                                                                                                           | <input type="checkbox"/>   | <input type="checkbox"/>                 | <input type="checkbox"/> | <input type="checkbox"/>  | <input type="checkbox"/>                      | <input type="checkbox"/> | <input type="checkbox"/> | <input type="checkbox"/> |
| <b>8. Home delivery of medicines</b>                                                                                                                                                                                                                                                                                                       | <input type="checkbox"/>   | <input type="checkbox"/>                 | <input type="checkbox"/> | <input type="checkbox"/>  | <input type="checkbox"/>                      | <input type="checkbox"/> | <input type="checkbox"/> | <input type="checkbox"/> |
| <b>9. Home care services</b><br>(Differentiated assistance to the elderly, isolated or having difficulties in their health and medication management, in partnership with the Health Center unit)                                                                                                                                          | <input type="checkbox"/>   | <input type="checkbox"/>                 | <input type="checkbox"/> | <input type="checkbox"/>  | <input type="checkbox"/>                      | <input type="checkbox"/> | <input type="checkbox"/> | <input type="checkbox"/> |
| <b>10. Point of care testing and screening</b><br>(identification of signs and symptoms of some health conditions and appropriate referral to a doctor (e.g. point-of-care HIV testing, urinary tract infection, diabetes)                                                                                                                 | <input type="checkbox"/>   | <input type="checkbox"/>                 | <input type="checkbox"/> | <input type="checkbox"/>  | <input type="checkbox"/>                      | <input type="checkbox"/> | <input type="checkbox"/> | <input type="checkbox"/> |
| <b>11. Disease prevention, healthy lifestyles and health promotion</b><br>(e.g. structured programs delivered at the pharmacy integrated into the health system, such as weight loss, and smoking cessation programs)                                                                                                                      | <input type="checkbox"/>   | <input type="checkbox"/>                 | <input type="checkbox"/> | <input type="checkbox"/>  | <input type="checkbox"/>                      | <input type="checkbox"/> | <input type="checkbox"/> | <input type="checkbox"/> |
| <b>12. Extended health care in pharmacies</b><br>(e.g. first aid, handling of minor wounds or burns, nutrition consultation, diabetic foot care)                                                                                                                                                                                           | <input type="checkbox"/>   | <input type="checkbox"/>                 | <input type="checkbox"/> | <input type="checkbox"/>  | <input type="checkbox"/>                      | <input type="checkbox"/> | <input type="checkbox"/> | <input type="checkbox"/> |
| <b>13. Provision of certain medicines exclusively dispensed at the hospital pharmacy and follow-up of treatment</b><br>Access to medicines currently only available at hospital level (e.g. cancer drugs, rheumatoid arthritis, Hepatitis C), at a community pharmacy of your choice without having to go to the hospital to pick them up. | <input type="checkbox"/>   | <input type="checkbox"/>                 | <input type="checkbox"/> | <input type="checkbox"/>  | <input type="checkbox"/>                      | <input type="checkbox"/> | <input type="checkbox"/> | <input type="checkbox"/> |

P14. From the previous list, chose the 5 most important services and order them from 1 to 5 1 being the most important and 5 being the least (SHOW CARD 1)

|    |                      |    |                      |
|----|----------------------|----|----------------------|
|    | Service              |    | Service              |
| 1. | <input type="text"/> | 4. | <input type="text"/> |
| 2. | <input type="text"/> | 5. | <input type="text"/> |
| 3. | <input type="text"/> |    |                      |

P15. Is there any other service not mentioned in the list that you would like to see available in your pharmacy?

- Yes. Which?  
\_\_\_\_\_
- No
- Don't know

P16. Do you think you will probably use the pharmacy more if some of the services we have been talking about become available? (READ)

- Not at all likely
- Unlikely
- Rather likely
- Very Likely
- Don't know

**V – SOCIODEMOGRAPHIC CHARACTERISTICS**

P17. Gender (WITHOUT ASKING):

- Male  Female

P18. Birthday date

|                      |                      |                      |
|----------------------|----------------------|----------------------|
| <input type="text"/> | <input type="text"/> | <input type="text"/> |
| (Day)                | (Month)              | (Year)               |

P19. Occupation (READ)

- Self-employed
- Employee
- Pensioner/Retired
- Permanent incapacity to work
- Unemployed
- Student
- Homemaker
- Other. Which? \_\_\_\_\_
- Prefer not to answer

P20. Marital Status (READ)

- Married/ or *de facto*
- Single
- widowed
- Divorced/ separated
- Prefer not to answer

P21. Highest education level completed

- No education
- Primary education (4<sup>th</sup> year)
- Primary education (6<sup>th</sup> year)
- Primary education (9<sup>th</sup> year)
- Secondary education (12<sup>th</sup> year)
- Bachelor / Graduate degree
- Master's degree
- Doctoral degree
- Prefer not to answer

P22. How many people live here, in your house, including yourself?

P23. On this Card 2, the following letters correspond to income brackets. Could you say which letter most closely matches your household average monthly income (after the discounts have been made):

|                          |                          |                          |                          |                          |                          |                          |                             |
|--------------------------|--------------------------|--------------------------|--------------------------|--------------------------|--------------------------|--------------------------|-----------------------------|
| C                        | F                        | H                        | N                        | O                        | P                        | V                        | <i>Prefer not to answer</i> |
| <input type="checkbox"/> | <input type="checkbox"/> | <input type="checkbox"/> | <input type="checkbox"/> | <input type="checkbox"/> | <input type="checkbox"/> | <input type="checkbox"/> | <input type="checkbox"/>    |

AT THE END:

1. CHECK IF ALL QUESTIONS WERE ASKED AND ANSWERED
2. REQUEST PHONE NUMBER FOR EVENTUAL QUALITY CONTROL

**THANK YOU**
